# Supplementary material for: Construction of a microporous inorganic–organic hybrid compound with uranyl units
Source: Royal Society of Chemistry journal article supplement (doi:10.1039/b406019a), 2004-01-01
Supplement: b406019a.pdf [file b406019a.pdf]

## Supporting Information

### Construction of a Microporous Inorganic-Organic Hybrid Compound with Uranyl Units

Zhen-Tao Yu, Zuo-Lei Liao, Yu-Sheng Jiang, Guang-Hua Li, Guo-Dong Li and Jie-Sheng Chen\*

*State Key Laboratory of Inorganic Synthesis and Preparative Chemistry, College of Chemistry, Jilin University, Changchun 130012, P. R. China*

---

To whom correspondence should be addressed: Professor Jie-Sheng Chen, College of Chemistry, Jilin University, Changchun 130012, P. R. China.  
E-mail: chemcj@mail.jlu.edu.cn.

**Materials and methods:** All reagents were of reagent grade and commercially available and used as received without further purification. Elemental microanalyses (C, H, N) were carried out on a Perkin-Elmer 2400 elemental analyzer. The metal contents were determined by inductively coupled plasma (ICP) analysis on a Perkin-Elmer optima 3300DV ICP spectrometer.

The powder X-ray diffraction (XRD) patterns (scan rate  $2^\circ \text{ min}^{-1}$ , Cu-K $\alpha$  radiation  $\lambda = 1.5418 \text{ \AA}$ ) were recorded on a Siemens D5005 diffractometer with a graphite monochromator at room temperature. The FT-IR spectra of the samples were obtained using KBr pellets within  $4000\text{-}500 \text{ cm}^{-1}$  on a Nicolet Impact 410 FTIR spectrometer. The differential thermal (DT) and the thermogravimetric analyses (TGA) were conducted on a Netzsch STA 449C thermal analyzer, under a flow of dry air at a heating rate of  $10 \text{ K min}^{-1}$ .

**Synthesis and general characterization:** Single crystals of **1** suitable for X-ray diffraction were synthesized from an aqueous solution that contained uranium component and organic ligands under a hydrothermal condition. The pure single-phase product of **1** was obtained, as confirmed by ICP and C, H and N elemental analysis, and by comparison of the observed powder XRD pattern with that generated from the single-crystal X-ray data.

The IR spectrum of **1** shows peaks at about  $3000\text{-}3600$  and  $1600\text{-}1700 \text{ cm}^{-1}$ , corresponding to water stretching and bending modes in the compound. Main IR features (KBr):  $\nu = 3475\text{w}, 3370\text{s}, 3113\text{w}, 2925\text{w}, 2357\text{w}, 1625\text{m}, 1584\text{s}, 1526\text{s}, 1472\text{m}, 1414\text{s}, 1387\text{m}, 1274\text{w}, 1220\text{w}, 1162\text{w}, 1117\text{m}, 1063\text{w}, 1014\text{w}, 965\text{w}, 905\text{s}, 856\text{w}, 821\text{m}, 775\text{w}, 717\text{m}, 664\text{m}, 565\text{m} \text{ cm}^{-1}$ .

Single-crystal X-ray data for **1** were collected at  $293(2) \text{ K}$  on a Bruker Smart-CCD diffractometer (Mo-K $\alpha$ ,  $\lambda = 0.71073 \text{ \AA}$ ). The structure was solved by direct methods (SHELXTL Version 5.10), and refined with the full-matrix least-squares on  $F^2$ . All non-hydrogen atoms were refined anisotropically and the aromatic hydrogen atoms were calculated ( $d_{\text{C-H}} = 0.93 \text{ \AA}$ ) and fixed with thermal parameters based on the carbon atoms to which they are bonded. The six H atoms attached to the oxygen atoms (Ow) of three water molecules in the empirical formula ( $[(\text{Ni}(\text{H}_2\text{O})\text{QA}(\text{bipy})\text{U}_{2.5}\text{O}_7(\text{H}_2\text{O})\text{OAc}] \cdot \text{H}_2\text{O}$ ) were not located. Of the 7063 reflections measured ( $2.43 \leq \theta \leq 25.01^\circ$ ), 4979 symmetry-independent reflections were used to solve the structure. Based on all these data and 397 refined parameters,  $R1 = 0.0346 [I > 2\sigma(I)]$ ,  $wR2 = 0.0943$ , and the goodness-of-fit on  $F^2$  was 1.046. The water molecules disordered over three crystallographically unique sites in the crystal structure of **1** was assigned partial occupancy factors, for a better structural resolution.

Adsorption measurement: the adsorption isotherms of  $\text{H}_2\text{O}$  were obtained at  $293 \text{ K}$  by measuring the increase in weight at equilibrium as a function of relative pressure. Measurements were performed using a CAHN 2000 electrogravimetric balance. A known weight (typically  $20\text{-}40 \text{ mg}$ ) of the as-synthesized sample was placed in a cylindrical Pt bucket, and then subjected to a heating program ( $300^\circ \text{C}$ ,  $3\text{ h}$ ) at vacuum in order to remove the guest water molecules. A point isotherm was recorded at the equilibrium state (the stage when no further weight change was observed).

Photocatalytic testing: photocatalytic reactions in aqueous phase were conducted in a water-cooled quartz (for Hg lamp UV light) or Pyrex (for xenon lamp light) cylindrical cell configuration. The reaction mixture inside the cell was maintained at  $20 \pm 2^\circ \text{C}$  by a continuous flow of water through an external cooling coil with magnetic

stirring, and were illuminated from an internal light source with about 2 cm optical path length. The UV light source was a 125 W high-pressure mercury lamp (HPML, main output 313.2 nm). The solar light experiments were performed using a 400 W xenon lamp (radiation wavelength > 400 nm). After the suspension containing a catalyst (160 mg) and the fresh aqueous solution of MB (80 mL, 0.10 mmolL<sup>-1</sup>) was ultrasonicated for 5 min and magnetically stirred in the dark for ca. 30 min to establish an adsorption/desorption equilibrium confirmed by monitoring the absorbance (at  $\lambda = 600$  nm) characteristic of the target MB (after stirred in the dark 30 min, no change for the absorbance), the lamp was inserted into the suspension. At given irradiation time intervals, 2 mL samples were collected, filtered through a Millipore filter to remove catalyst particles, and analyzed immediately by UV-vis spectroscopy with a Perkin-Elmer Lambda 20 UV-vis spectrometer. The photocatalytic performance of the catalysts was estimated by monitoring the variation of the dye concentrations through UV-vis spectroscopy.

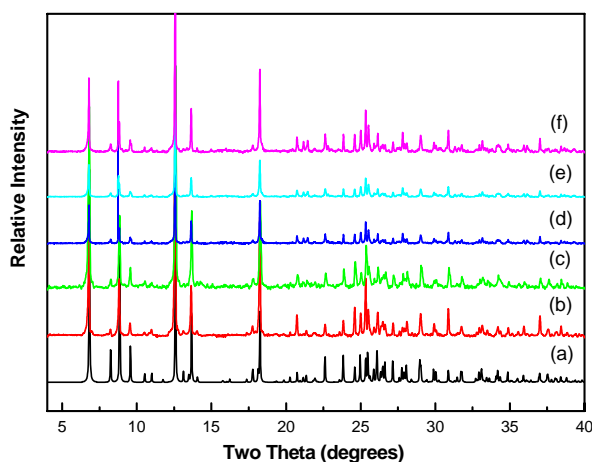

**Figure S1.** Comparison of the simulated XRD pattern (a) for the as-synthesized **1** on the basis of the single crystal structure with the experimental XRD patterns for the as-synthesized compound (b), for the samples calcined at 300 °C for 3 h (c), for the samples after photocatalysis testing (MB) by UV irradiation (d), for the samples after photocatalysis testing (MB) by visible light irradiation (e) and for the samples after dehydration-rehydraton process (f).

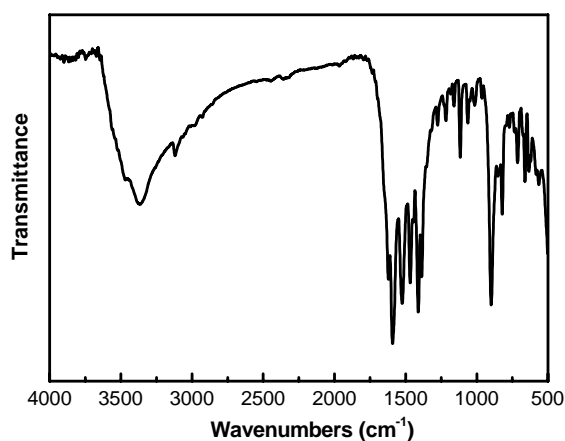

**Figure S2.** Infrared spectrum of **1**.

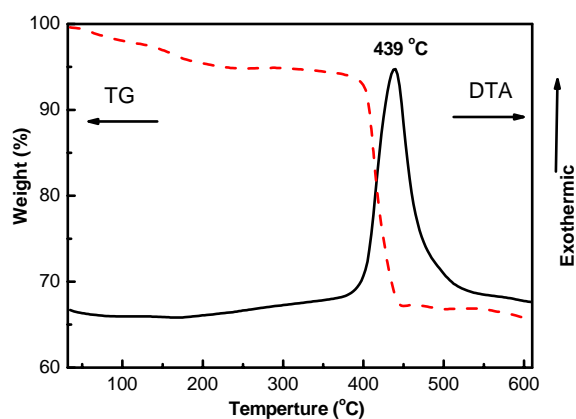

**Figure S3.** TG and DTA curves of **1**.

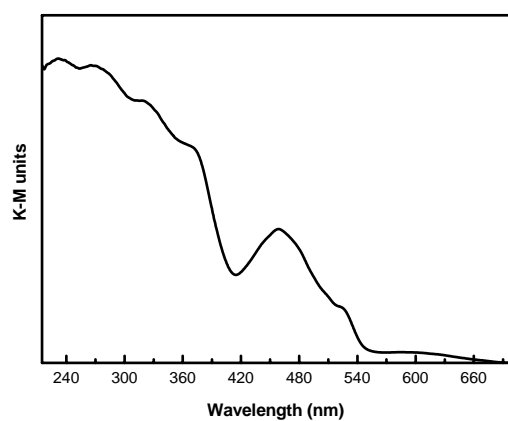

**Figure S4.** UV-vis diffuse reflectance spectrum for **1** using BaSO<sub>4</sub> as the background.

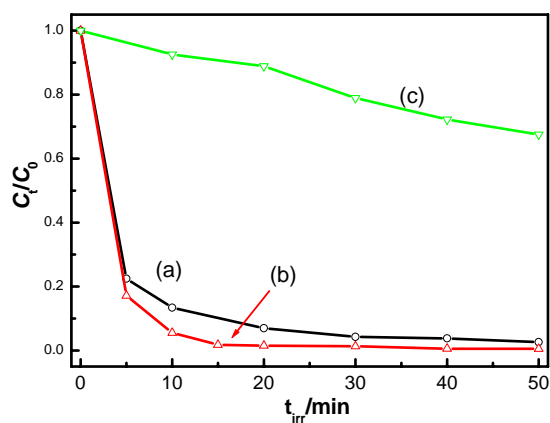

**Figure S5.** Concentration changes of MB under UV irradiation in the presence of (a) **1** (160 mg), (b) the commercial TiO<sub>2</sub> Degussa P-25 (160 mg) and (c) no photocatalyst. It is seen that the photocatalytic activity of **1** is comparable with that of TiO<sub>2</sub> which is being widely used as a photocatalyst.

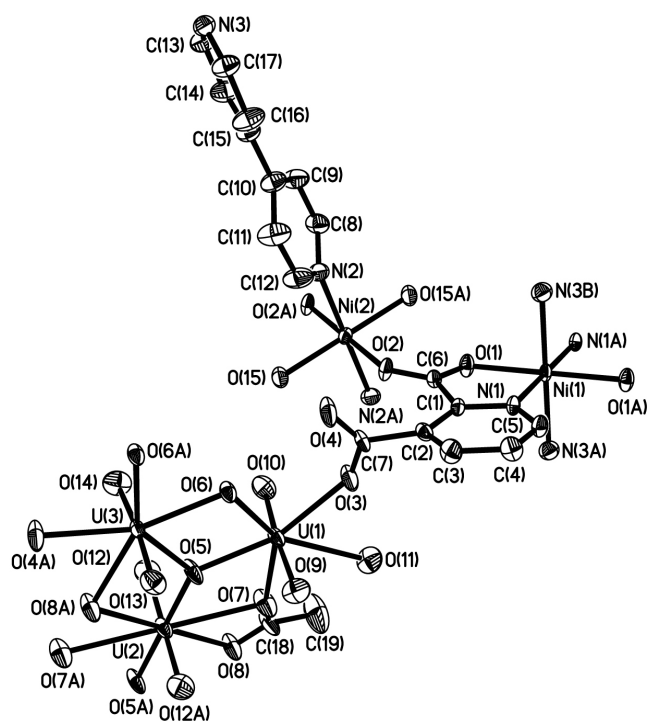

**Figure S6.** ORTEP drawing of the asymmetric unit of **1**. Thermal ellipsoids are shown at 50 % probability.

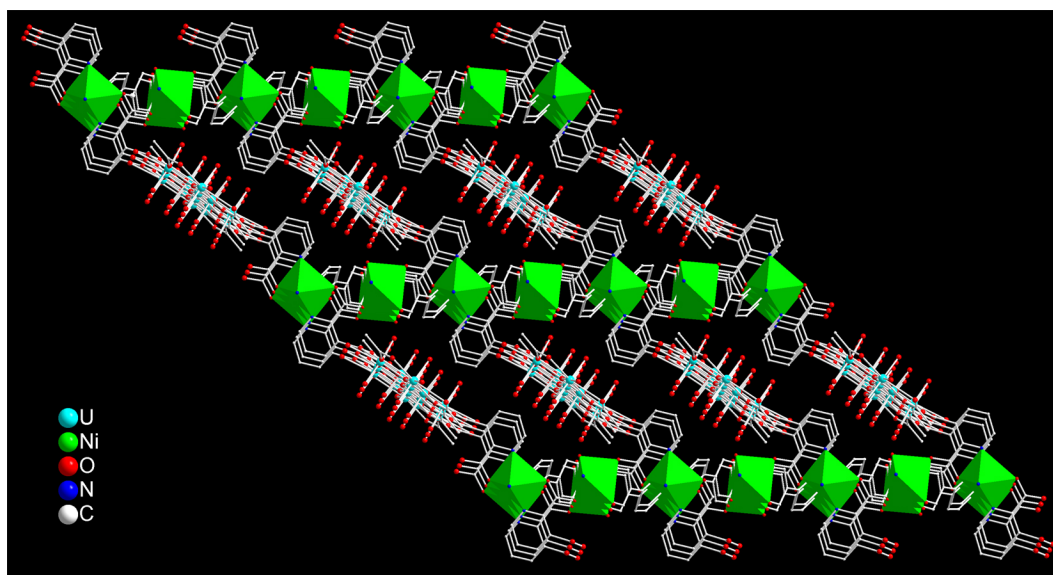

**Figure S7.** View of the structure of **1** along the *b* axis. Channels are obvious along this direction.

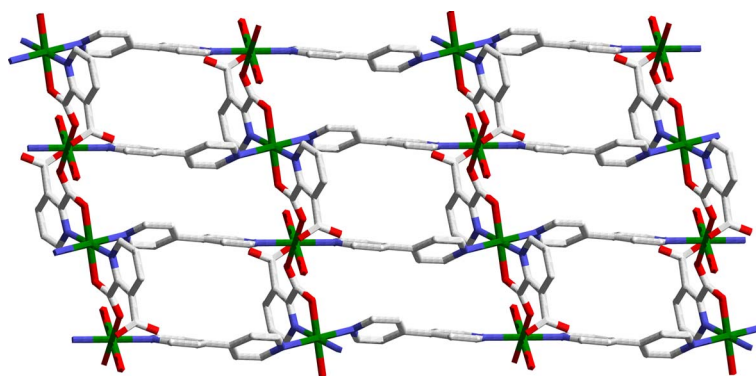

**Figure S8.** View of the Ni-organic layer along the *ab* plane in **1**.

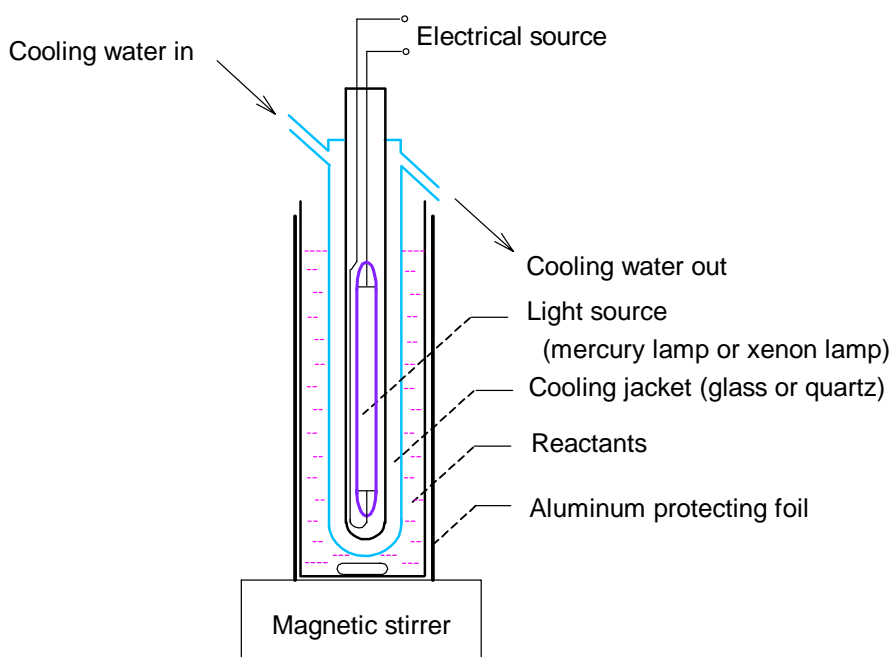

**Figure S9.** Schematic diagram of the photoreactor. When irradiated with UV light (mercury lamp), water-cooled quartz cylindrical cell configuration was used; while irradiated with xenon-lamp light, water-cooled Pyrex configuration was used.

Table S1. Crystal data and structure refinement for **1**.

|                                                                                          |                                                                                   |
|------------------------------------------------------------------------------------------|-----------------------------------------------------------------------------------|
| empirical formula                                                                        | C <sub>19</sub> H <sub>20</sub> N <sub>3</sub> NiO <sub>16</sub> U <sub>2.5</sub> |
| formula weight                                                                           | 1200.17                                                                           |
| temperature [K]                                                                          | 293(2)                                                                            |
| crystal system                                                                           | Triclinic                                                                         |
| space group                                                                              | <i>P</i> -1                                                                       |
| <i>a</i> [Å]                                                                             | 10.5466(2)                                                                        |
| <i>b</i> [Å]                                                                             | 10.8779(2)                                                                        |
| <i>c</i> [Å]                                                                             | 13.4741(3)                                                                        |
| $\alpha$ [°]                                                                             | 89.1470(10)                                                                       |
| $\beta$ [°]                                                                              | 74.0720(10)                                                                       |
| $\gamma$ [°]                                                                             | 80.1120(10)                                                                       |
| <i>V</i> [Å <sup>3</sup> ]                                                               | 1463.54(5)                                                                        |
| <i>Z</i>                                                                                 | 2                                                                                 |
| $\rho$ [Mg/m <sup>3</sup> ]                                                              | 2.723                                                                             |
| $\mu$ [mm <sup>-1</sup> ]                                                                | 14.053                                                                            |
| <i>F</i> (000)                                                                           | 1082                                                                              |
| theta range [°]                                                                          | 2.43-25.01                                                                        |
| limiting indices                                                                         | -12 ≤ <i>h</i> ≤ 7, -12 ≤ <i>k</i> ≤ 12, -16 ≤ <i>l</i> ≤ 15                      |
| reflections collected / unique                                                           | 7063/4979                                                                         |
| completeness to theta = 25.01                                                            | 96.4 %                                                                            |
| data / parameters                                                                        | 4979/397                                                                          |
| Goof                                                                                     | 1.046                                                                             |
| <i>R</i> <sup>1</sup> / <i>wR</i> <sup>2</sup> <sup>b</sup> [ <i>I</i> > 2σ( <i>I</i> )] | 0.0346/0.0943                                                                     |
| <i>R</i> <sup>1</sup> / <i>wR</i> <sup>2</sup> (all data)                                | 0.0371/0.0958                                                                     |

$$^{\text{[a]}} R_1 = \frac{\sum \|F_o\| - \|F_c\|}{\sum \|F_o\|}, \quad ^{\text{[b]}} wR_2 = \left[ \frac{\sum [w(F_o^2 - F_c^2)^2]}{\sum [w(F_o^2)^2]} \right]^{1/2}.$$

Table S2. Atomic coordinates ( $\times 10^4$ ) and equivalent isotropic displacement parameters ( $\text{\AA}^2 \times 10^3$ ) for **1**.  $U(\text{eq})$  is defined as one third of the trace of the orthogonalized  $U_{ij}$  tensor.

| Atom   | x        | y        | z        | $U(\text{eq})^a$ |
|--------|----------|----------|----------|------------------|
| U(1)   | 3298(1)  | 2518(1)  | 3947(1)  | 22(1)            |
| U(2)   | 5000     | 5000     | 5000     | 26(1)            |
| U(3)   | 5514(1)  | 1335(1)  | 5534(1)  | 18(1)            |
| Ni(1)  | 0        | 0        | 0        | 17(1)            |
| Ni(2)  | 5000     | 0        | 0        | 18(1)            |
| O(1)   | 1873(5)  | 186(5)   | 33(4)    | 24(1)            |
| O(2)   | 3227(5)  | -212(5)  | 1052(4)  | 22(1)            |
| O(3)   | 2305(6)  | 1078(5)  | 3190(5)  | 36(2)            |
| O(4)   | 2957(7)  | -925(5)  | 3392(5)  | 39(2)            |
| O(5)   | 4554(7)  | 3097(5)  | 4870(5)  | 37(2)            |
| O(6)   | 4217(6)  | 773(5)   | 4527(5)  | 26(1)            |
| O(7)   | 3342(8)  | 4816(6)  | 3884(6)  | 48(2)            |
| O(8)   | 4003(7)  | 6590(5)  | 3871(5)  | 39(2)            |
| O(9)   | 1886(7)  | 2720(6)  | 5081(5)  | 39(2)            |
| O(10)  | 4597(7)  | 2400(6)  | 2740(5)  | 35(2)            |
| O(11)  | 1469(7)  | 3580(6)  | 3113(5)  | 41(2)            |
| O(12)  | 6427(7)  | 4632(6)  | 3889(6)  | 42(2)            |
| O(13)  | 4119(6)  | 1466(6)  | 6675(5)  | 33(1)            |
| O(14)  | 6976(7)  | 1297(6)  | 4461(5)  | 40(2)            |
| O(15)  | 5630(6)  | 424(6)   | 1265(4)  | 30(1)            |
| O(1W)  | 8996(14) | 2678(14) | 3425(14) | 58(4)            |
| O(2W)  | 8320(30) | 6130(30) | 2740(20) | 48(7)            |
| O(2W') | 9150(30) | 5670(20) | 3088(19) | 38(6)            |
| N(1)   | -179(6)  | -318(5)  | 1542(5)  | 17(1)            |
| N(2)   | 5833(7)  | -1862(6) | 157(5)   | 25(2)            |
| N(3)   | 9251(7)  | -8045(6) | 356(5)   | 26(2)            |
| C(1)   | 941(7)   | -217(6)  | 1795(6)  | 18(2)            |
| C(2)   | 1033(8)  | -314(6)  | 2807(6)  | 19(2)            |
| C(3)   | -35(9)   | -642(8)  | 3526(6)  | 29(2)            |
| C(4)   | -1204(9) | -788(8)  | 3277(6)  | 27(2)            |
| C(5)   | -1223(7) | -586(7)  | 2275(6)  | 21(2)            |
| C(6)   | 2117(7)  | -48(7)   | 898(6)   | 20(2)            |
| C(7)   | 2209(8)  | -36(7)   | 3143(6)  | 23(2)            |
| C(8)   | 6619(9)  | -2546(8) | -674(6)  | 30(2)            |
| C(9)   | 7297(10) | -3727(8) | -626(7)  | 36(2)            |
| C(10)  | 7159(9)  | -4298(8) | 327(7)   | 31(2)            |
| C(11)  | 6351(11) | -3591(9) | 1198(7)  | 44(2)            |
| C(12)  | 5704(10) | -2395(8) | 1077(7)  | 38(2)            |



|       |          |          |          |       |
|-------|----------|----------|----------|-------|
| C(13) | 9761(9)  | -7203(8) | -311(7)  | 33(2) |
| C(14) | 9118(10) | -5992(8) | -331(7)  | 35(2) |
| C(15) | 7883(9)  | -5569(8) | 389(7)   | 31(2) |
| C(16) | 7397(10) | -6409(8) | 1109(7)  | 37(2) |
| C(17) | 8087(9)  | -7608(8) | 1076(7)  | 34(2) |
| C(18) | 3368(11) | 5896(8)  | 3540(8)  | 42(2) |
| C(19) | 2763(17) | 6276(13) | 2672(12) | 76(4) |

Table S3. Bond lengths [ $\text{\AA}$ ] and angles [ $^\circ$ ] for **1**<sup>a</sup>.

|                     |            |                     |            |
|---------------------|------------|---------------------|------------|
| U(1)-O(9)           | 1.803(7)   | U(1)-O(10)          | 1.806(7)   |
| U(1)-O(6)           | 2.213(5)   | U(1)-O(5)           | 2.217(6)   |
| U(1)-O(3)           | 2.406(5)   | U(1)-O(7)           | 2.507(6)   |
| U(1)-O(11)          | 2.588(6)   |                     |            |
| U(2)-O(12)          | 1.800(7)   | U(2)-O(12)#1        | 1.800(7)   |
| U(2)-O(5)           | 2.220(5)   | U(2)-O(5)#1         | 2.220(5)   |
| U(2)-O(7)           | 2.633(7)   | U(2)-O(7)#1         | 2.633(7)   |
| U(2)-O(8)           | 2.566(6)   | U(2)-O(8) #1        | 2.566(6)   |
| U(3)-O(14)          | 1.796(6)   | U(3)-O(13)          | 1.800(6)   |
| U(3)-O(6)#2         | 2.261(5)   | U(3)-O(5)           | 2.297(5)   |
| U(3)-O(6)           | 2.326(5)   | U(3)-O(4)#2         | 2.431(6)   |
| U(3)-O(8)#1         | 2.584(6)   |                     |            |
| Ni(1)-O(1)          | 2.033(5)   | Ni(1)-O(1)#3        | 2.033(5)   |
| Ni(1)-N(1)          | 2.063(6)   | Ni(1)-N(1)#3        | 2.063(6)   |
| Ni(1)-N(3)#4        | 2.150(7)   | Ni(1)-N(3)#5        | 2.150(7)   |
| Ni(2)-O(2)          | 2.060(5)   | Ni(2)-O(2)#6        | 2.060(5)   |
| Ni(2)-O(15)         | 2.075(5)   | Ni(2)-O(15)#6       | 2.075(5)   |
| Ni(2)-N(2)          | 2.097(6)   | Ni(2)-N(2)#6        | 2.097(6)   |
| O(3)-U(1)-O(11)     | 65.9(2)    | O(3)-U(1)-O(7)      | 136.3(2)   |
| O(5)-U(1)-O(7)      | 67.44(19)  | O(5)-U(1)-O(11)     | 137.5(2)   |
| O(5)-U(1)-O(3)      | 156.16(19) | O(6)-U(1)-O(3)      | 81.82(19)  |
| O(6)-U(1)-O(5)      | 74.3(2)    | O(6)-U(1)-O(7)      | 141.6(2)   |
| O(6)-U(1)-O(11)     | 146.7(2)   | O(7)-U(1)-O(11)     | 71.5(2)    |
| O(9)-U(1)-O(10)     | 174.1(3)   | O(9)-U(1)-O(7)      | 92.2(3)    |
| O(9)-U(1)-O(6)      | 91.4(3)    | O(9)-U(1)-O(5)      | 89.7(3)    |
| O(9)-U(1)-O(3)      | 90.6(3)    | O(9)-U(1)-O(11)     | 81.2(3)    |
| O(10)-U(1)-O(6)     | 93.7(3)    | O(10)-U(1)-O(7)     | 85.5(3)    |
| O(10)-U(1)-O(5)     | 94.4(3)    | O(10)-U(1)-O(11)    | 92.9(3)    |
| O(10)-U(1)-O(3)     | 87.3(3)    |                     |            |
| O(5)-U(2)-O(7)      | 65.09(19)  | O(5)#1-U(2)-O(7)    | 114.91(19) |
| O(5)#1-U(2)-O(7)#1  | 65.09(19)  | O(5)#1-U(2)-O(8)    | 66.22(19)  |
| O(5)-U(2)-O(7)#1    | 114.91(19) | O(5)-U(2)-O(8)      | 113.78(19) |
| O(5)-U(2)-O(8)#1    | 66.22(19)  | O(5)#1-U(2)-O(8)#1  | 113.78(19) |
| O(5)#1-U(2)-O(5)    | 180.000(1) | O(8)#1-U(2)-O(8)    | 180.0(2)   |
| O(8)#1-U(2)-O(7)#1  | 49.06(19)  | O(8)-U(2)-O(7)#1    | 130.94(19) |
| O(12)-U(2)-O(12)#1  | 180.000(1) | O(12)-U(2)-O(8)#1   | 93.7(3)    |
| O(12)-U(2)-O(5)#1   | 90.7(3)    | O(12)#1-U(2)-O(8)#1 | 86.3(3)    |
| O(12)#1-U(2)-O(5)#1 | 89.3(3)    | O(12)-U(2)-O(8)     | 86.3(3)    |
| O(12)-U(2)-O(5)     | 89.3(3)    | O(12)#1-U(2)-O(8)   | 93.7(3)    |
| O(12)#1-U(2)-O(5)   | 90.7(3)    | O(12)-U(2)-O(7)#1   | 88.6(3)    |

|                      |            |                      |            |
|----------------------|------------|----------------------|------------|
| O(12)-U(2)-O(7)      | 91.4(3)    | O(12)#1-U(2)-O(7)#1  | 91.4(3)    |
| O(12)#1-U(2)-O(7)    | 88.6(3)    | O(8)#1-U(2)-O(7)     | 130.94(19) |
| O(7)#1-U(2)-O(7)     | 180.000(1) | O(8)-U(2)-O(7)       | 49.06(19)  |
| O(4)#2-U(3)-O(8)#1   | 69.86(19)  | O(5)-U(3)-O(8)#1     | 64.91(19)  |
| O(5)-U(3)-O(4)#2     | 134.6(2)   | O(5)-U(3)-O(6)       | 70.7(2)    |
| O(6)#2-U(3)-O(8)#1   | 152.23(19) | O(6)#2-U(3)-O(4)#2   | 82.37(19)  |
| O(6)-U(3)-O(8)#1     | 135.55(18) | O(6)-U(3)-O(4)#2     | 154.59(19) |
| O(6)#2-U(3)-O(6)     | 72.2(2)    | O(6)#2-U(3)-O(5)     | 142.7(2)   |
| O(13)-U(3)-O(8)#1    | 87.6(3)    | O(13)-U(3)-O(4)#2    | 89.6(3)    |
| O(13)-U(3)-O(6)#2    | 92.6(3)    | O(13)-U(3)-O(5)      | 92.0(3)    |
| O(13)-U(3)-O(6)      | 91.2(3)    | O(14)-U(3)-O(6)#2    | 90.8(3)    |
| O(14)-U(3)-O(5)      | 87.9(3)    | O(14)-U(3)-O(8)#1    | 87.3(3)    |
| O(14)-U(3)-O(6)      | 94.0(3)    | O(14)-U(3)-O(4)#2    | 86.5(3)    |
| O(14)-U(3)-O(13)     | 174.5(3)   |                      |            |
| O(1)-Ni(1)-O(1)#3    | 180.0      | O(1)#3-Ni(1)-N(3)#5  | 92.1(2)    |
| O(1)-Ni(1)-N(1)      | 81.0(2)    | N(1)-Ni(1)-N(3)#5    | 89.7(2)    |
| O(1)#3-Ni(1)-N(1)    | 99.0(2)    | N(1)#3-Ni(1)-N(3)#5  | 90.3(2)    |
| O(1)-Ni(1)-N(1)#3    | 99.0(2)    | N(3)#4-Ni(1)-N(3)#5  | 180.0(4)   |
| O(1)#3-Ni(1)-N(1)#3  | 81.0(2)    | O(1)-Ni(1)-N(3)#5    | 87.9(2)    |
| N(1)-Ni(1)-N(1)#3    | 180.0(3)   | N(1)-Ni(1)-N(3)#4    | 90.3(2)    |
| O(1)-Ni(1)-N(3)#4    | 92.1(2)    | N(1)#3-Ni(1)-N(3)#4  | 89.7(2)    |
| O(1)#3-Ni(1)-N(3)#4  | 87.9(2)    |                      |            |
| O(2)#6-Ni(2)-O(2)    | 180.0(3)   | O(15)-Ni(2)-N(2)     | 86.7(2)    |
| O(2)#6-Ni(2)-O(15)   | 93.8(2)    | O(15)#6-Ni(2)-N(2)   | 93.3(2)    |
| O(2)-Ni(2)-O(15)     | 86.2(2)    | O(2)#6-Ni(2)-N(2)#6  | 90.9(2)    |
| O(2)#6-Ni(2)-O(15)#6 | 86.2(2)    | O(2)-Ni(2)-N(2)#6    | 89.1(2)    |
| O(2)-Ni(2)-O(15)#6   | 93.8(2)    | O(15)-Ni(2)-N(2)#6   | 93.3(2)    |
| O(15)-Ni(2)-O(15)#6  | 180.0(3)   | O(15)#6-Ni(2)-N(2)#6 | 86.7(2)    |
| O(2)#6-Ni(2)-N(2)    | 89.1(2)    | N(2)-Ni(2)-N(2)#6    | 180.0      |
| O(2)-Ni(2)-N(2)      | 90.9(2)    |                      |            |

<sup>a</sup> Symmetry transformations used to generate equivalent atoms:

#1 -x+1,-y+1,-z+1      #2 -x+1,-y,-z+1      #3 -x,-y,-z      #4 x-1,y+1,z  
#5 -x+1,-y-1,-z      #6 -x+1,-y,-z      #7 x+1,y-1,z

Table S4. Anisotropic displacement parameters ( $\text{\AA}^2 \times 10^3$ ) for **1**. The anisotropic displacement factor exponent takes the form:  $-2\pi^2[h^2a^2U11+ \dots + 2hkabU12]$ .

|       | U11   | U22   | U33   | U23   | U13    | U12    |
|-------|-------|-------|-------|-------|--------|--------|
| U(1)  | 33(1) | 18(1) | 22(1) | 2(1)  | -18(1) | -6(1)  |
| U(2)  | 40(1) | 15(1) | 30(1) | 1(1)  | -23(1) | -6(1)  |
| U(3)  | 21(1) | 17(1) | 20(1) | 1(1)  | -11(1) | -5(1)  |
| Ni(1) | 13(1) | 23(1) | 15(1) | 2(1)  | -7(1)  | -3(1)  |
| Ni(2) | 12(1) | 22(1) | 20(1) | -1(1) | -5(1)  | -2(1)  |
| O(1)  | 18(3) | 40(3) | 16(3) | 4(2)  | -8(2)  | -7(2)  |
| O(2)  | 11(3) | 36(3) | 22(3) | 6(2)  | -7(2)  | -6(2)  |
| O(3)  | 45(4) | 24(3) | 52(4) | 1(3)  | -36(3) | -7(3)  |
| O(4)  | 47(4) | 28(3) | 62(4) | 8(3)  | -44(4) | -11(3) |
| O(5)  | 68(5) | 15(3) | 46(4) | 3(2)  | -45(4) | -7(3)  |
| O(6)  | 33(3) | 17(3) | 36(3) | 1(2)  | -24(3) | -6(2)  |
| O(7)  | 72(5) | 27(3) | 62(5) | 8(3)  | -48(4) | -8(3)  |
| O(8)  | 68(5) | 20(3) | 48(4) | 8(3)  | -44(4) | -11(3) |

|        |        |        |        |        |        |        |
|--------|--------|--------|--------|--------|--------|--------|
| O(9)   | 44(4)  | 38(4)  | 33(4)  | 6(3)   | -8(3)  | -1(3)  |
| O(10)  | 43(4)  | 32(3)  | 33(3)  | 2(3)   | -11(3) | -15(3) |
| O(11)  | 46(4)  | 41(4)  | 36(4)  | 12(3)  | -17(3) | -4(3)  |
| O(12)  | 48(4)  | 35(4)  | 44(4)  | 0(3)   | -13(3) | -6(3)  |
| O(13)  | 32(3)  | 40(4)  | 27(3)  | -2(3)  | -1(3)  | -13(3) |
| O(14)  | 33(4)  | 43(4)  | 40(4)  | 0(3)   | 2(3)   | -13(3) |
| O(15)  | 22(3)  | 43(3)  | 27(3)  | -7(3)  | -10(2) | -5(3)  |
| O(1W)  | 33(6)  | 47(7)  | 91(9)  | 26(6)  | -12(6) | -11(5) |
| O(2W)  | 59(11) | 45(10) | 41(10) | -1(8)  | -6(8)  | -21(8) |
| O(2W') | 37(9)  | 31(9)  | 32(9)  | -13(7) | 13(7)  | -1(8)  |
| N(1)   | 10(3)  | 22(3)  | 21(3)  | 2(2)   | -5(3)  | -4(2)  |
| N(2)   | 24(4)  | 27(4)  | 22(4)  | -1(3)  | -6(3)  | 0(3)   |
| N(3)   | 26(4)  | 28(4)  | 25(4)  | 3(3)   | -8(3)  | -2(3)  |
| C(1)   | 16(4)  | 19(3)  | 21(4)  | -3(3)  | -8(3)  | -2(3)  |
| C(2)   | 26(4)  | 14(3)  | 20(4)  | 1(3)   | -12(3) | -4(3)  |
| C(3)   | 31(5)  | 36(5)  | 21(4)  | 2(3)   | -10(4) | -3(4)  |
| C(4)   | 28(5)  | 35(4)  | 19(4)  | 5(3)   | -5(3)  | -10(4) |
| C(5)   | 15(4)  | 29(4)  | 20(4)  | 1(3)   | -3(3)  | -5(3)  |
| C(6)   | 16(4)  | 21(4)  | 24(4)  | 1(3)   | -8(3)  | -6(3)  |
| C(7)   | 26(4)  | 27(4)  | 21(4)  | -2(3)  | -13(3) | -9(3)  |
| C(8)   | 41(5)  | 31(4)  | 17(4)  | 1(3)   | -11(4) | -2(4)  |
| C(9)   | 46(6)  | 31(5)  | 25(4)  | -3(4)  | -8(4)  | 5(4)   |
| C(10)  | 31(5)  | 26(4)  | 32(5)  | 7(3)   | -5(4)  | -1(4)  |
| C(11)  | 62(7)  | 32(5)  | 25(5)  | 5(4)   | -1(5)  | 4(4)   |
| C(12)  | 50(6)  | 33(5)  | 21(4)  | -2(4)  | -2(4)  | 4(4)   |
| C(13)  | 28(5)  | 30(4)  | 36(5)  | -1(4)  | -2(4)  | -3(4)  |
| C(14)  | 40(5)  | 23(4)  | 37(5)  | 0(4)   | -2(4)  | -5(4)  |
| C(15)  | 35(5)  | 27(4)  | 29(4)  | 4(3)   | -8(4)  | -3(4)  |
| C(16)  | 38(5)  | 31(5)  | 29(5)  | 3(4)   | 6(4)   | 5(4)   |
| C(17)  | 37(5)  | 26(4)  | 33(5)  | 2(4)   | -6(4)  | 1(4)   |
| C(18)  | 67(7)  | 18(4)  | 57(6)  | -1(4)  | -43(6) | -9(4)  |
| C(19)  | 103(8) | 70(7)  | 87(8)  | 21(6)  | -68(7) | -32(6) |

Table S5. Hydrogen coordinates ( $\times 10^4$ ) and isotropic displacement parameters ( $\text{\AA}^2 \times 10^3$ ) for **1**.  $U(\text{eq})$  is defined as one third of the trace of the orthogonalized  $U_{ij}$  tensor.

| Atom   | x     | y     | z     | $U(\text{eq})$ |
|--------|-------|-------|-------|----------------|
| H(3)   | 16    | -772  | 4198  | 80             |
| H(4)   | -1931 | -1011 | 3767  | 80             |
| H(5)   | -2005 | -639  | 2097  | 80             |
| H(8)   | 6709  | -2198 | -1320 | 80             |
| H(9)   | 7848  | -4150 | -1226 | 80             |
| H(11)  | 6246  | -3916 | 1852  | 80             |
| H(12)  | 5154  | -1942 | 1663  | 80             |
| H(13)  | 10593 | -7453 | -783  | 80             |
| H(14)  | 9502  | -5456 | -823  | 80             |
| H(16)  | 6598  | -6164 | 1619  | 80             |
| H(17)  | 7735  | -8149 | 1576  | 80             |
| H(19A) | 2320  | 5629  | 2524  | 80             |
| H(19B) | 3456  | 6407  | 2069  | 80             |
| H(19C) | 2126  | 7035  | 2869  | 80             |
